# Supplementary material
Source: PubMed Central journal article supplement (PMC5099118)
Supplement: NIHMS809333-supplement-1.pdf [file NIHMS809333-supplement-1.pdf]

# Supplement I: Detailed SISS results

*ISLES 2015 - A public evaluation benchmark for ischemic stroke lesion segmentation from multispectral MRI*

Oskar Maier et al.

February 12, 2016

This document lists the detailed result graphs for all teams over all testing dataset cases. Failed cases are denoted by missing data points. Please refer to the online version for zoomable graphs.

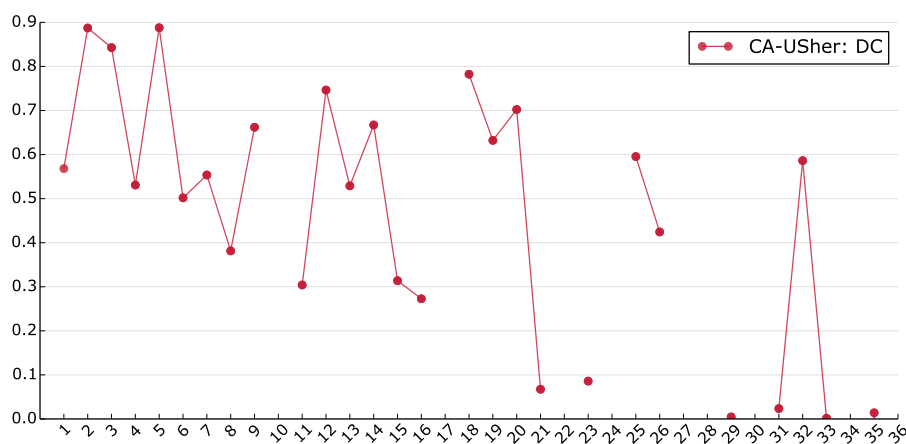

(a) DC results

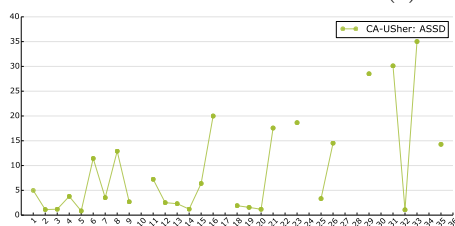

(b) ASSD results

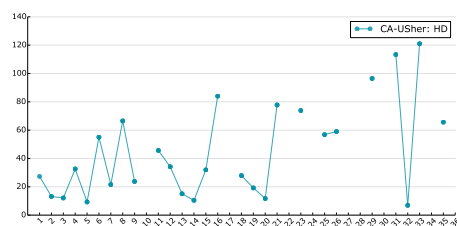

(c) HD results

Figure 1: Results for team CA-USher on the SISS dataset over all cases.



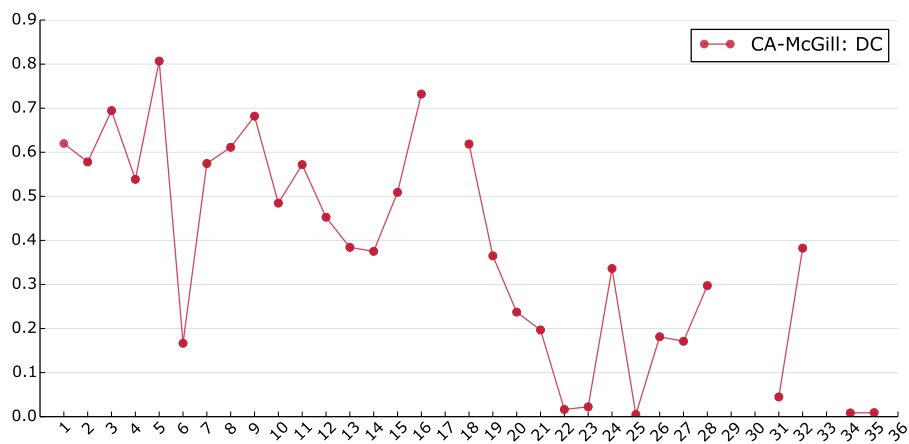

(a) DC results

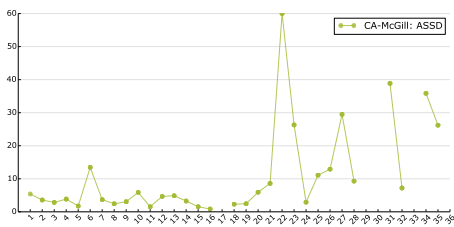

(b) ASSD results

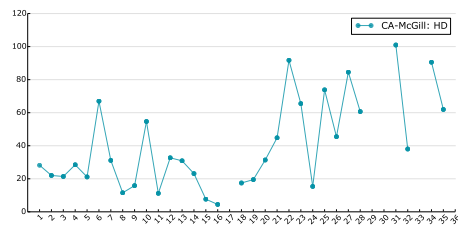

(c) HD results

Figure 3: Results for team CA-McGill on the SISS dataset over all cases.

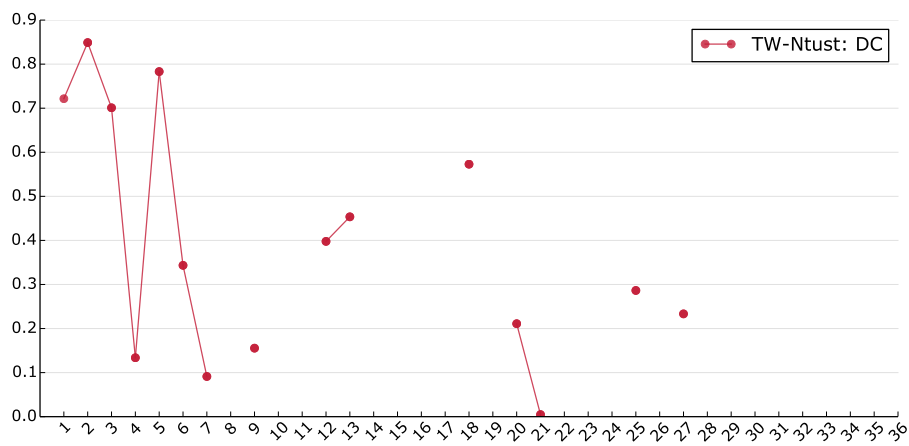

(a) DC results

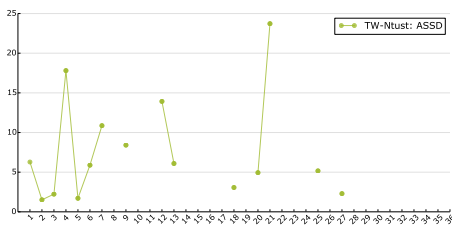

(b) ASSD results

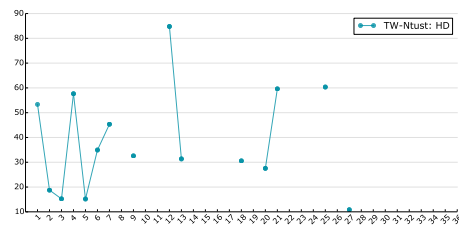

(c) HD results

Figure 4: Results for team TW-Ntust on the SISS dataset over all cases.

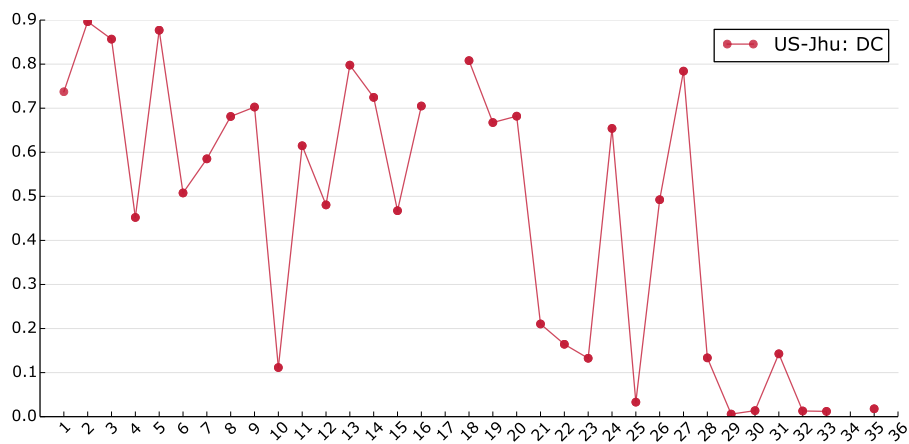

(a) DC results

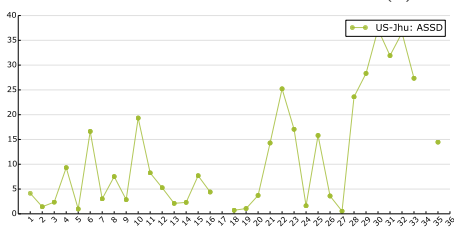

(b) ASSD results

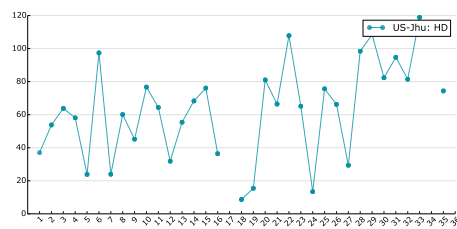

(c) HD results

Figure 5: Results for team US-Jhu on the SISS dataset over all cases.

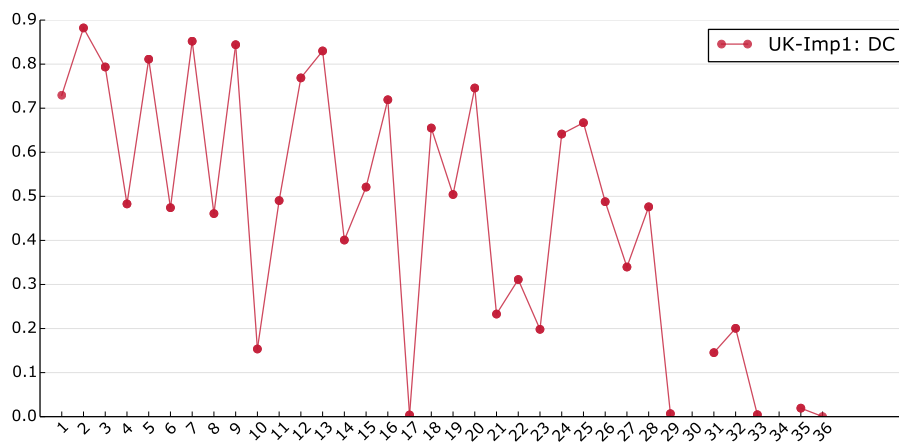

(a) DC results

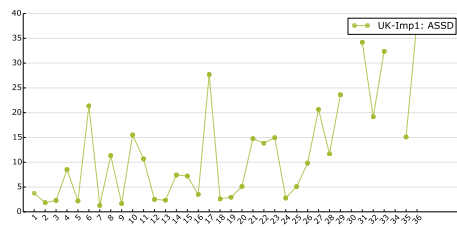

(b) ASSD results

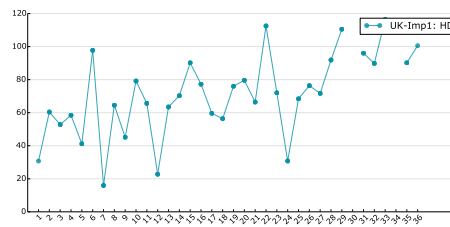

(c) HD results

Figure 6: Results for team UK-Imp1 on the SISS dataset over all cases.

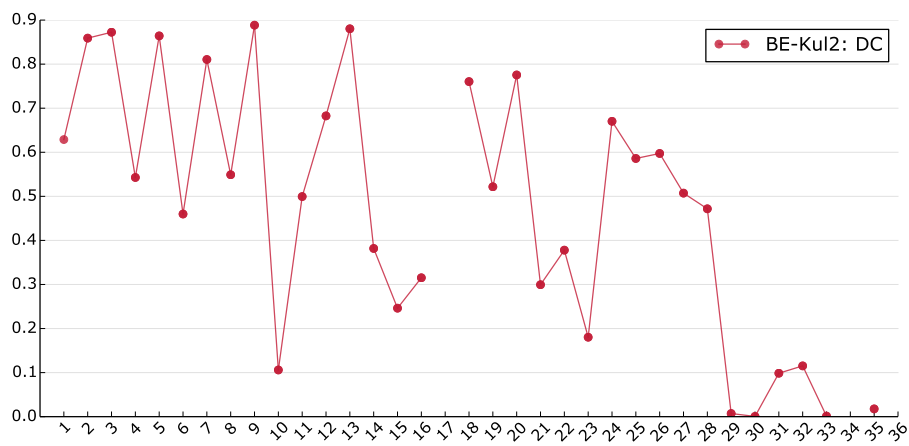

(a) DC results

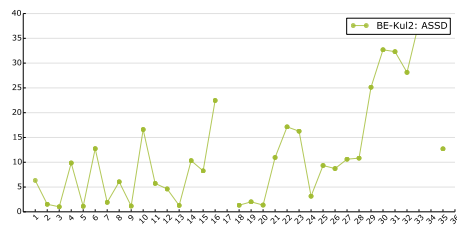

(b) ASSD results

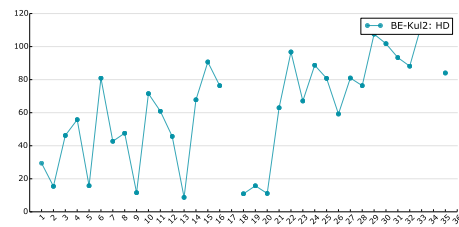

(c) HD results

Figure 7: Results for team BE-Kul2 on the SISS dataset over all cases.

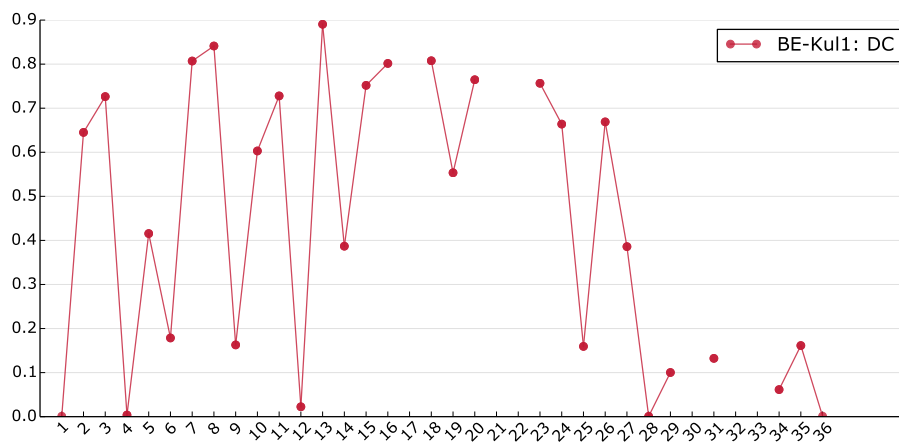

(a) DC results

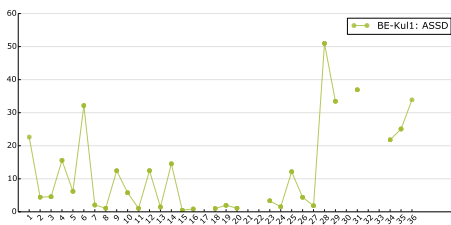

(b) ASSD results

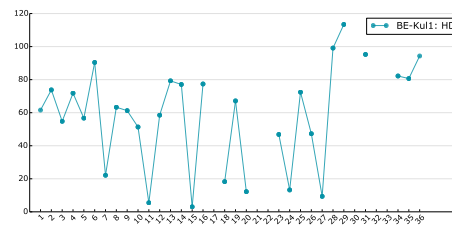

(c) HD results

Figure 8: Results for team BE-Kul1 on the SISS dataset over all cases.



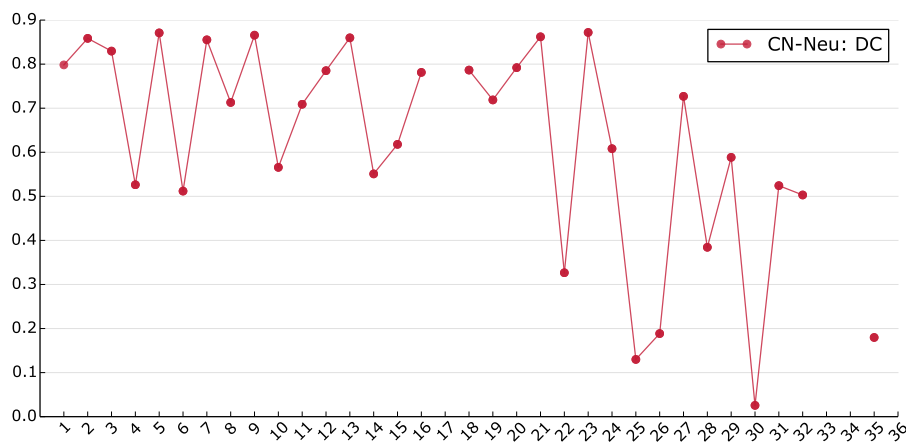

(a) DC results

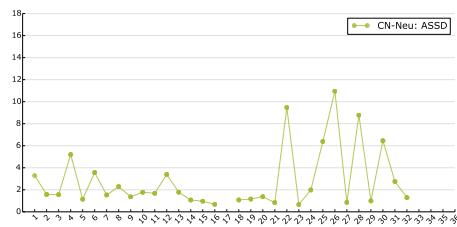

(b) ASSD results

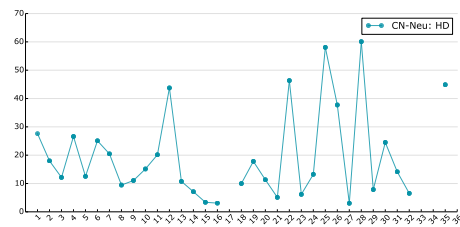

(c) HD results

Figure 9: Results for team CN-Neu on the SISS dataset over all cases.

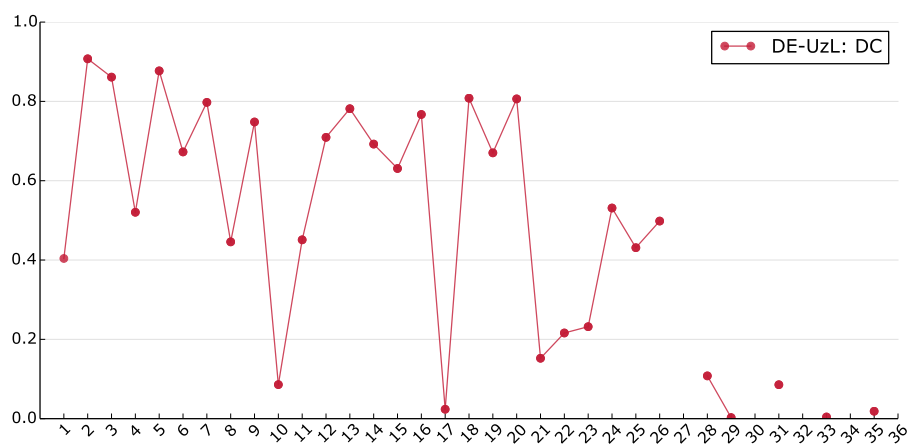

(a) DC results

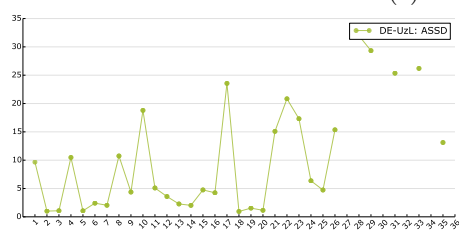

(b) ASSD results

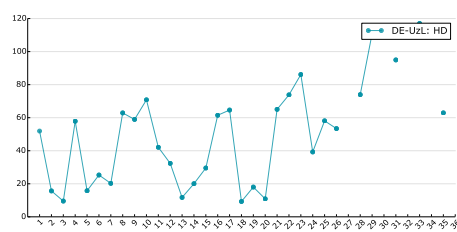

(c) HD results

Figure 10: Results for team DE-UzL on the SISS dataset over all cases.

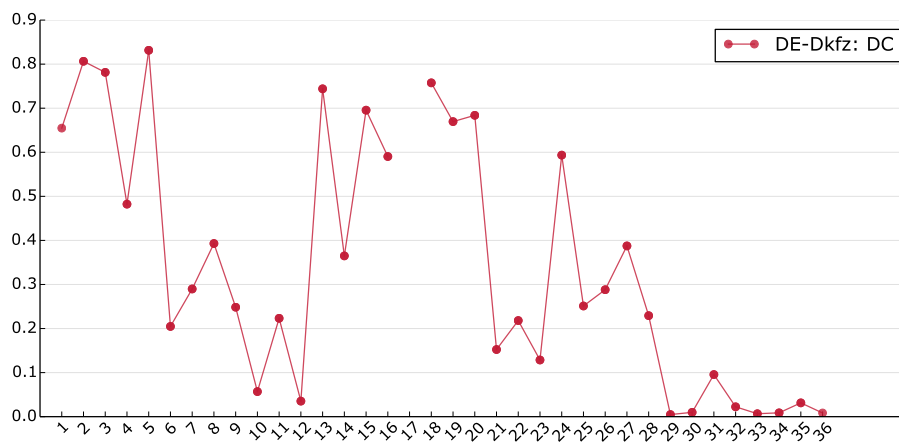

(a) DC results

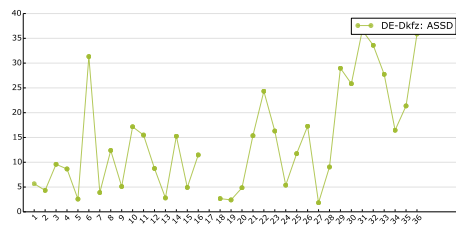

(b) ASSD results

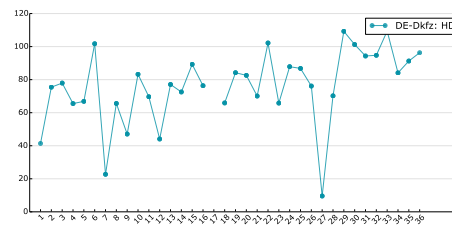

(c) HD results

Figure 11: Results for team DE-Dkfz on the SISS dataset over all cases.

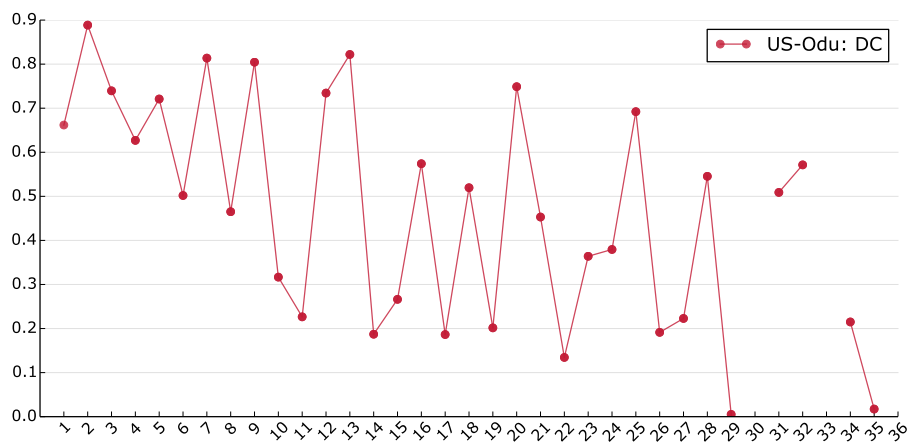

(a) DC results

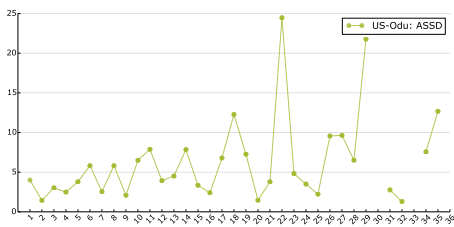

(b) ASSD results

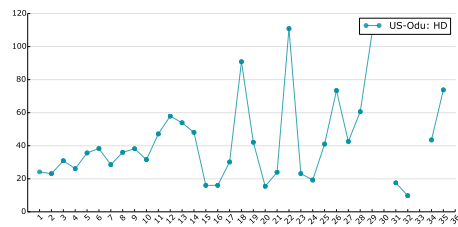

(c) HD results

Figure 12: Results for team US-Odu on the SISS dataset over all cases.

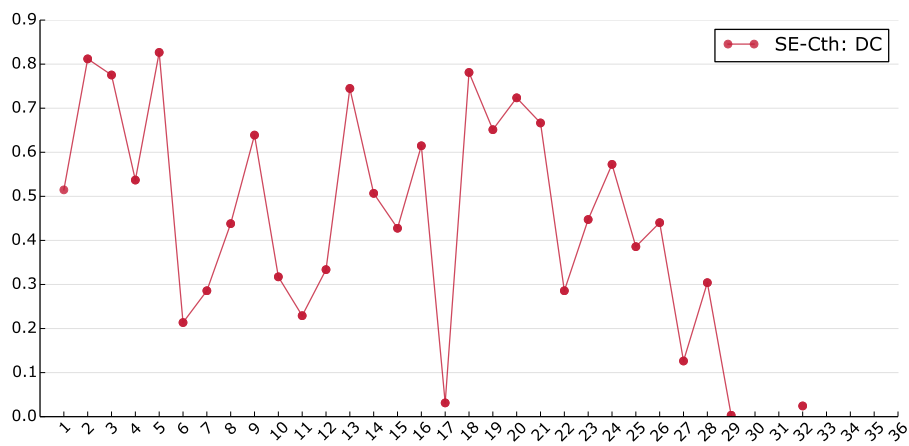

(a) DC results

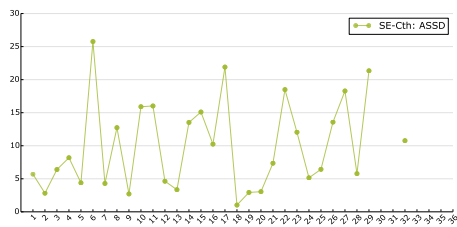

(b) ASSD results

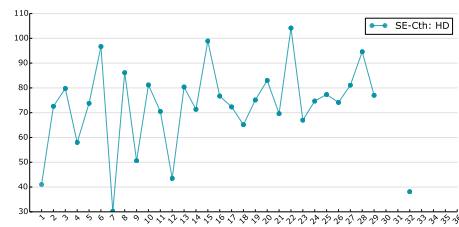

(c) HD results

Figure 13: Results for team SE-Cth on the SISS dataset over all cases.

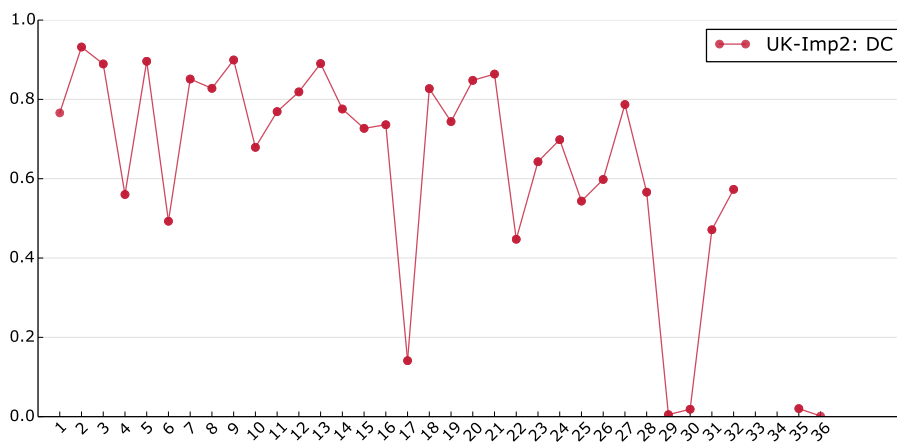

(a) DC results

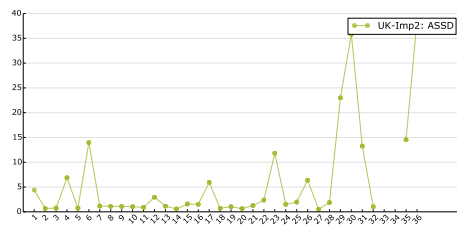

(b) ASSD results

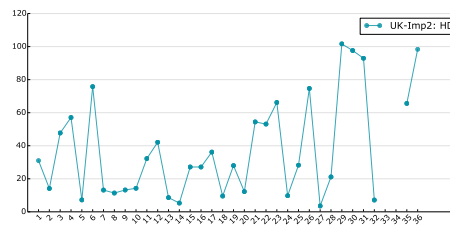

(c) HD results

Figure 14: Results for team UK-Imp2 on the SISS dataset over all cases.
