# Supplementary material
Source: PubMed Central journal article supplement (PMC5099118)
Supplement: NIHMS809333-supplement-5.pdf [file NIHMS809333-supplement-5.pdf]

# Supplement V: SISS correlations

*ISLES 2015 - A public evaluation benchmark for ischemic stroke  
lesion segmentation from multispectral MRI*

Oskar Maier et al.

February 12, 2016

This document list various correlation plots between characteristics of the SISS testing dataset and the average DC results obtained over all teams.

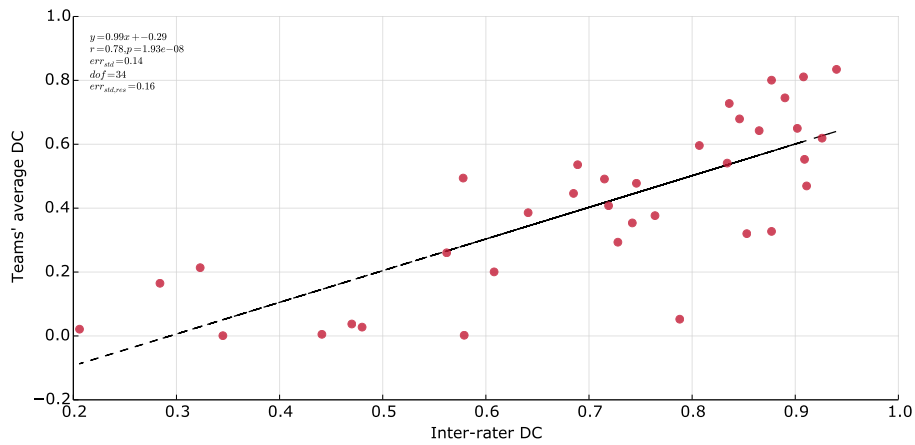

Figure 1: Correlation between inter-rater performance and average DC over all teams per case.

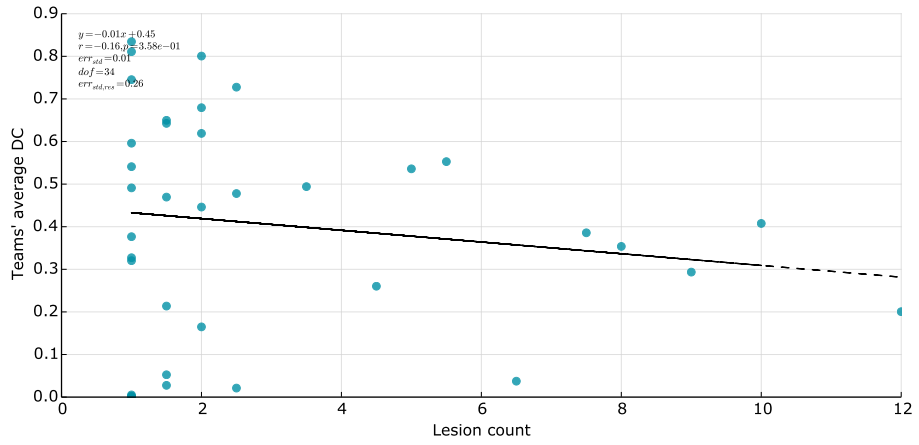

Figure 2: Correlation between the number of lesions and average DC over all teams per case.

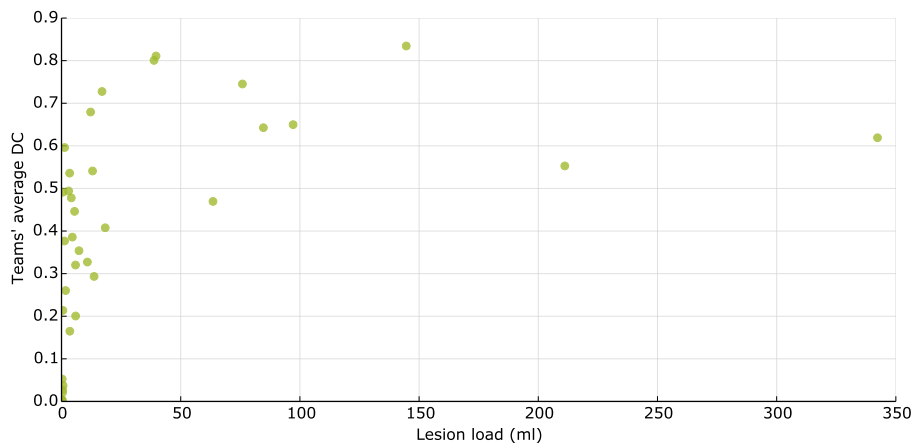

Figure 3: Correlation between the lesion load in *ml* and average DC over all teams per case.
